# Supplementary material for: Carfilzomib-associated pulmonary arterial hypertension in multiple myeloma
Source: PubMed Central journal article supplement — Pulm Circ. 2021 Sep 29;11(4):20458940211049300. doi: 10.1177/20458940211049300 (PMC8485285; doi:10.1177/20458940211049300), 2021-09-29
Supplement: sj-pdf-1-pul-10.1177_20458940211049300.pdf [file sj-pdf-1-pul-10.1177_20458940211049300.pdf]

Supplement: Video captions

**Video 1a-b:** Transthoracic echocardiogram of patient 1 in a) parasternal long view and b) four-chamber view, showing thickened interventricular septum, enlarged right ventricle and reduced right ventricular systolic function.

**Video 2a-c:** Initial echocardiogram (while on carfilzomib) for patient 2 in multiple views showing severely enlarged right ventricle, reduced right ventricular systolic function, dilated right atrium, and evidence of right ventricular pressure overload. a) Parasternal long view, b) Parasternal short view, c) Four-chamber view.

**Video 3a-b:** Two-month follow up echocardiogram for patient 2 after being on double oral combination therapy for pulmonary arterial hypertension and off carfilzomib showing normal right ventricular size and normal right ventricular function. a) Parasternal short view and b) Four-chamber view.
